# Supplementary material
Source: PubMed Central journal article supplement (PMC4355037)
Supplement: NIHMS655414-supplement-1.pdf [file NIHMS655414-supplement-1.pdf]

| miRNA name        | Avg FCR | log2(Avg FCR) | p-value  | Avg WT FC | Avg <i>Aicda</i> <sup>-/-</sup> FC |
|-------------------|---------|---------------|----------|-----------|------------------------------------|
| mmu-miR-182       | 2.32    | 1.21          | 4.11E-05 | 90.97     | 39.28                              |
| mmu-miR-467a      | 2.22    | 1.15          | 1.65E-04 | 19.99     | 9.00                               |
| mmu-miR-98*       | 2.40    | 1.26          | 4.00E-02 | 12.96     | 5.41                               |
| mmu-miR-155       | 1.62    | 0.69          | 2.44E-02 | 12.42     | 7.68                               |
| mmu-miR-92b       | 1.50    | 0.59          | 4.11E-05 | 11.47     | 7.64                               |
| mmu-miR-219-5p    | 2.28    | 1.19          | 4.11E-05 | 10.35     | 4.55                               |
| mmu-miR-130b      | 1.64    | 0.71          | 4.11E-05 | 5.72      | 3.49                               |
| mmu-miR-374       | 3.93    | 1.97          | 7.77E-03 | 3.74      | 0.95                               |
| mmu-miR-148a      | 2.09    | 1.07          | 4.11E-05 | 3.71      | 1.77                               |
| mmu-miR-17*       | 1.81    | 0.85          | 1.23E-03 | 2.95      | 1.64                               |
| mmu-miR-15b       | 1.79    | 0.84          | 4.11E-05 | 2.23      | 1.24                               |
| mmu-miR-221       | 1.81    | 0.85          | 1.88E-02 | 2.20      | 1.21                               |
| mmu-miR-21        | 2.14    | 1.10          | 4.11E-05 | 2.01      | 0.94                               |
| mmu-miR-15a       | 1.57    | 0.65          | 4.11E-05 | 1.25      | 0.79                               |
| mmu-miR-152       | 1.82    | 0.86          | 1.42E-02 | 1.17      | 0.65                               |
| mmu-miR-195       | 2.89    | 1.53          | 4.11E-05 | 1.14      | 0.39                               |
| mmu-miR-16        | 1.66    | 0.73          | 4.11E-05 | 1.13      | 0.68                               |
| mmu-miR-7a        | 2.03    | 1.02          | 1.42E-02 | 1.05      | 0.52                               |
| mmu-miR-23a       | 1.84    | 0.88          | 8.23E-05 | 0.76      | 0.41                               |
| mmu-miR-328       | 0.66    | -0.59         | 4.11E-05 | 0.67      | 1.01                               |
| mmu-miR-200c      | 1.61    | 0.69          | 7.82E-04 | 0.58      | 0.36                               |
| mmu-miR-340-3p    | 1.53    | 0.61          | 1.06E-02 | 0.43      | 0.28                               |
| mmu-miR-1981*     | 0.64    | -0.63         | 7.77E-03 | 0.43      | 0.67                               |
| mmu-miR-146a*     | 0.63    | -0.67         | 7.82E-04 | 0.41      | 0.65                               |
| mmu-miR-200b      | 2.38    | 1.25          | 1.65E-04 | 0.38      | 0.16                               |
| mmu-miR-330       | 0.52    | -0.95         | 8.23E-05 | 0.37      | 0.72                               |
| mmu-miR-141       | 1.78    | 0.83          | 4.00E-02 | 0.27      | 0.15                               |
| mmu-miR-26b       | 1.56    | 0.64          | 7.82E-04 | 0.22      | 0.14                               |
| mmu-miR--3107;486 | 1.76    | 0.82          | 1.88E-02 | 0.11      | 0.06                               |

FC = Activated/Resting  
FCR = (WT FC)/(*Aicda*<sup>-/-</sup> FC)

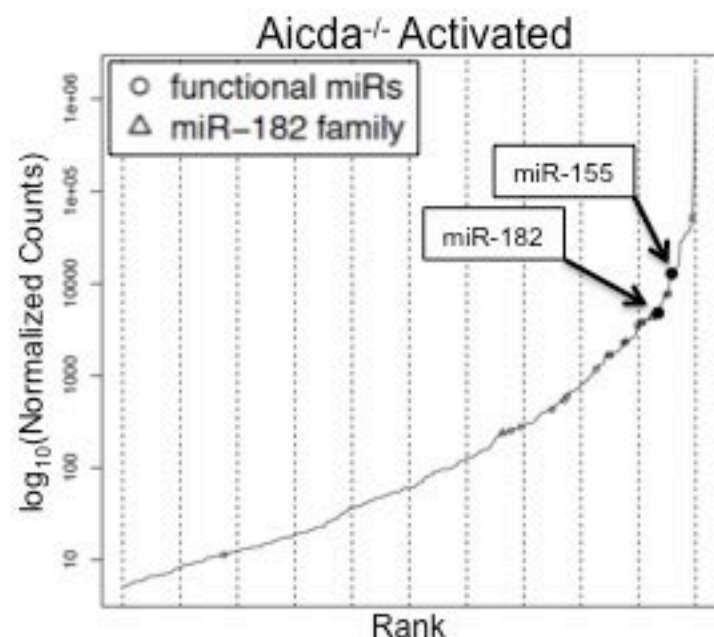

### Functional miRs

|              |                 |
|--------------|-----------------|
| mmu-miR-16   | mmu-miR-17      |
| mmu-miR-181a | mmu-miR-210     |
| mmu-miR-92a  | mmu-miR-19a     |
| mmu-miR-93   | mmu-miR-15a     |
| mmu-miR-92b  | mmu-miR-181b    |
| mmu-miR-150  | mmu-miR-18a     |
| mmu-miR-19b  | mmu-miR-29b     |
| mmu-miR-29a  | mmu-miR-125b-5p |
| mmu-miR-20a  |                 |

Figure S1. Small RNA sequencing top candidates, *Aicda*<sup>-/-</sup> waterfall plot, and “functional miRs”.

Bone Marrow

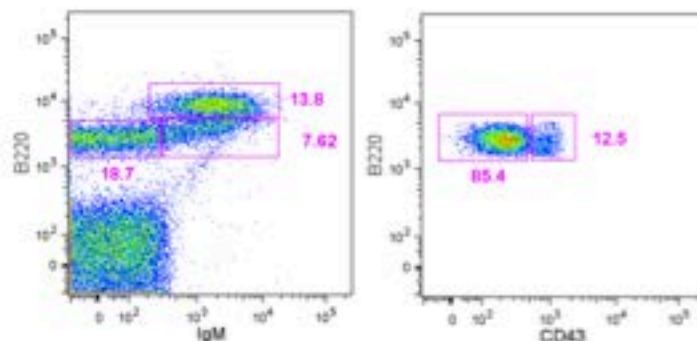

Left plot:  
Left gate = Pro/Pre  
Bottom right = Immature  
Top right = Recirculating

Right plot:  
Left gate = Pre  
Right = Pro

Spleen

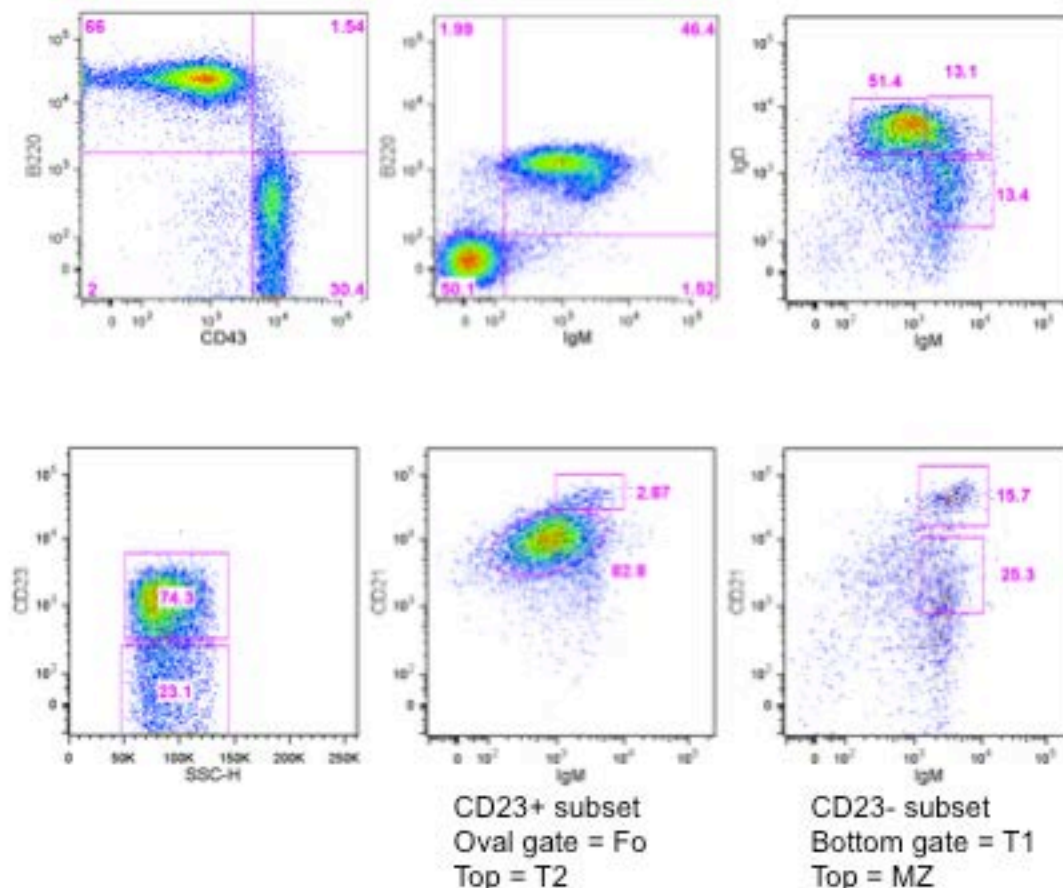

Top left gate = Mature  
Top right = IgD<sup>hi</sup> IgM<sup>hi</sup>  
Bottom right = Immature

CD23+ subset  
Oval gate = Fo  
Top = T2

CD23- subset  
Bottom gate = T1  
Top = MZ

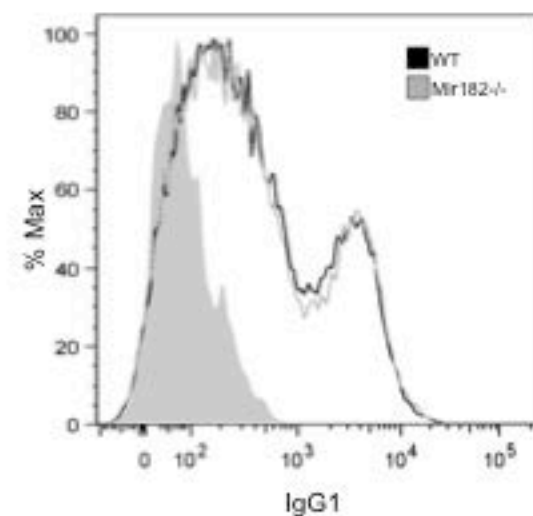

**Figure S2.** Representative flow cytometry plots of B cell development. *Mir182*<sup>-/-</sup> sample 1 is shown. Histogram overlay shows CSR efficiency in *ex vivo* activated B cells at 72 hr. Filled grey histogram is unstained sample. (Corresponds to **Figure 2**).

Thymus

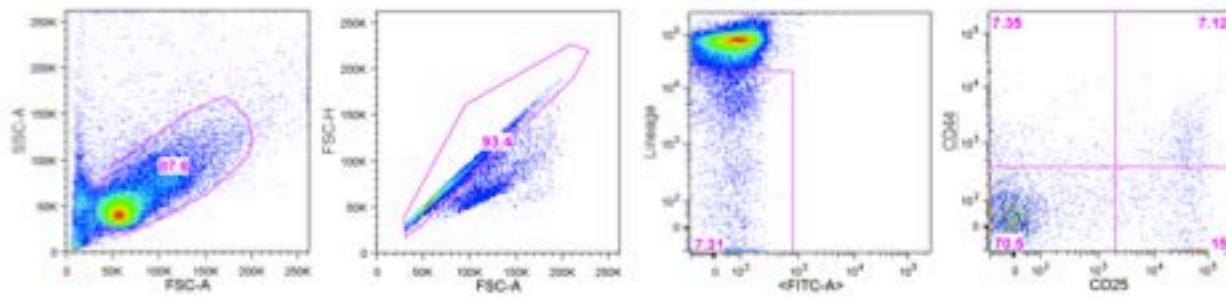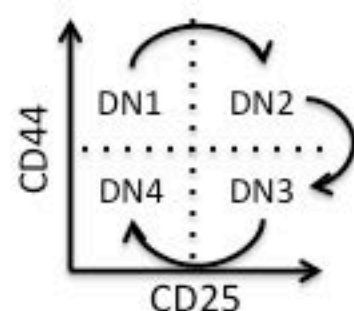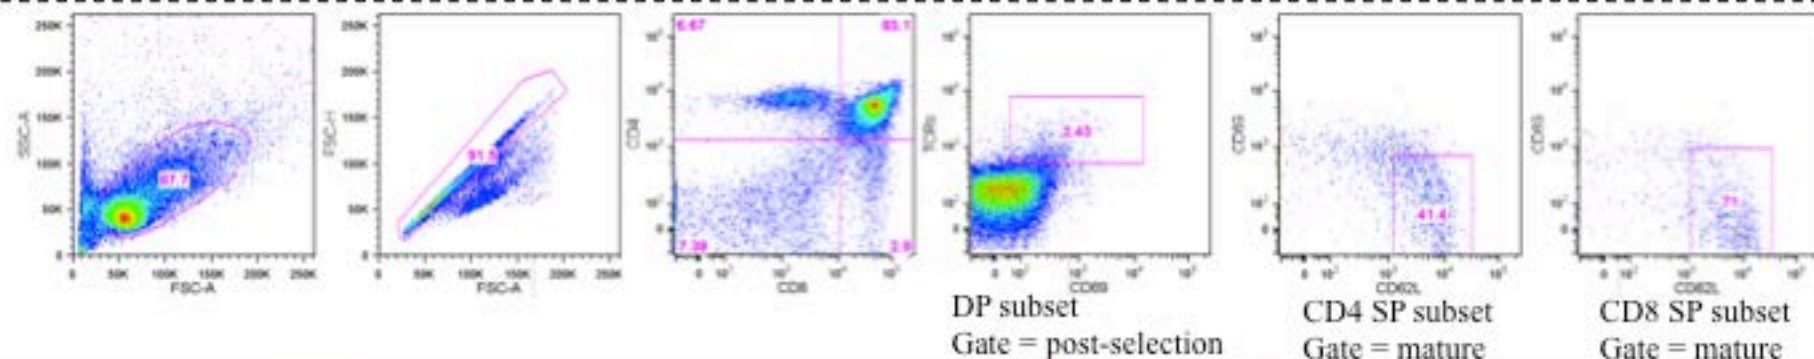

LN

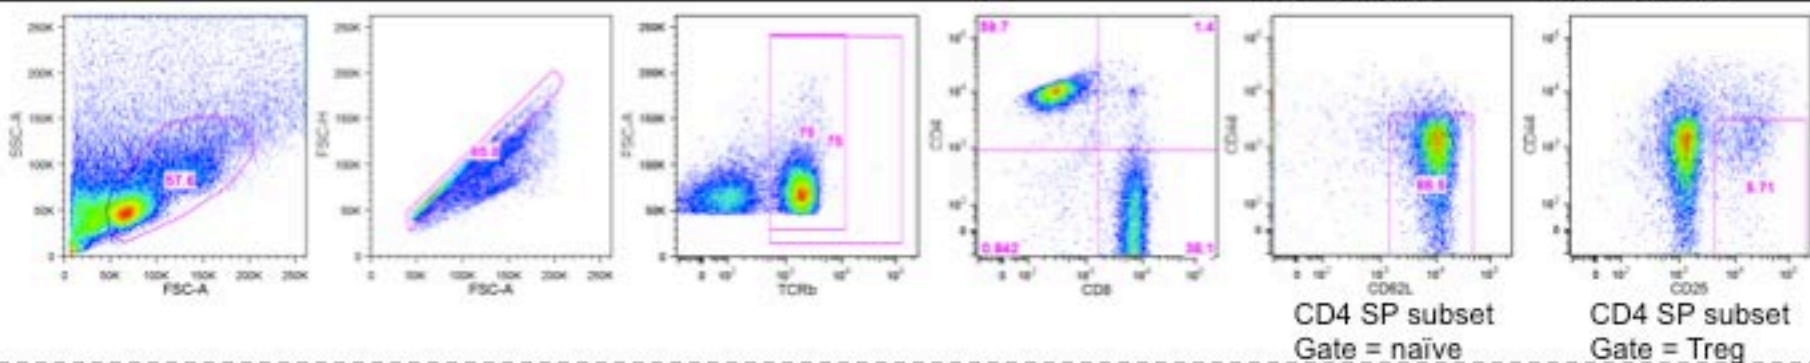

Spleen

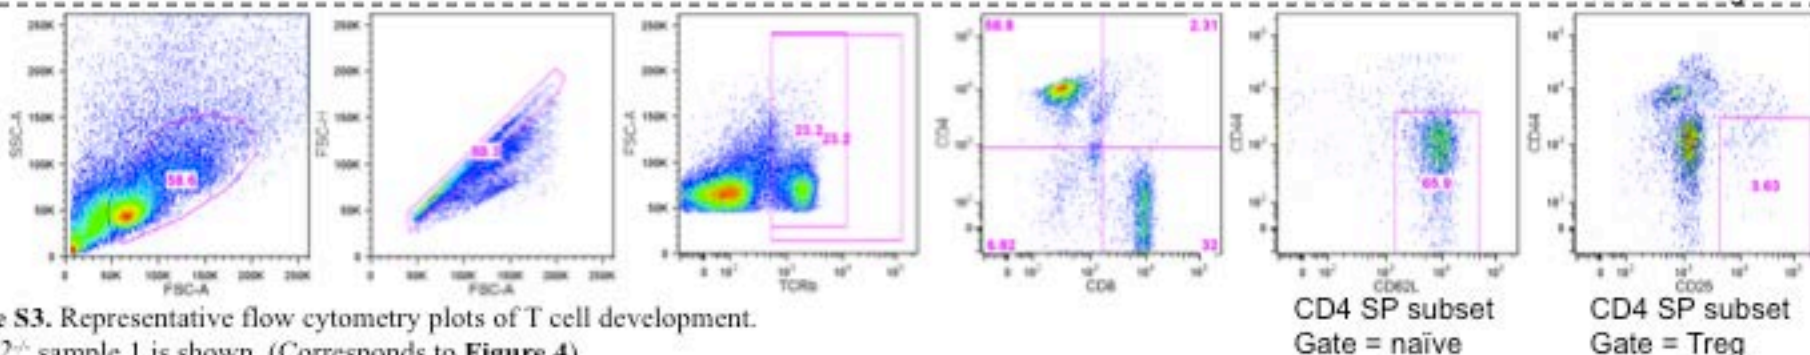

**Figure S3.** Representative flow cytometry plots of T cell development. *Mir182*<sup>-/-</sup> sample 1 is shown. (Corresponds to **Figure 4**).

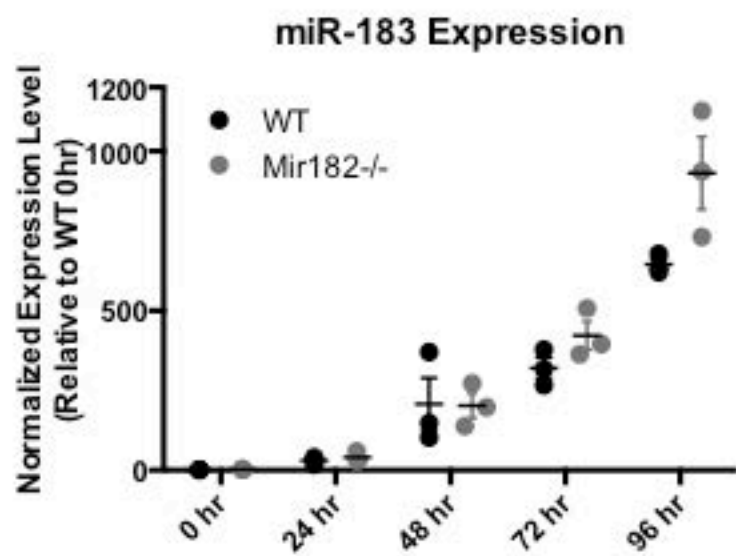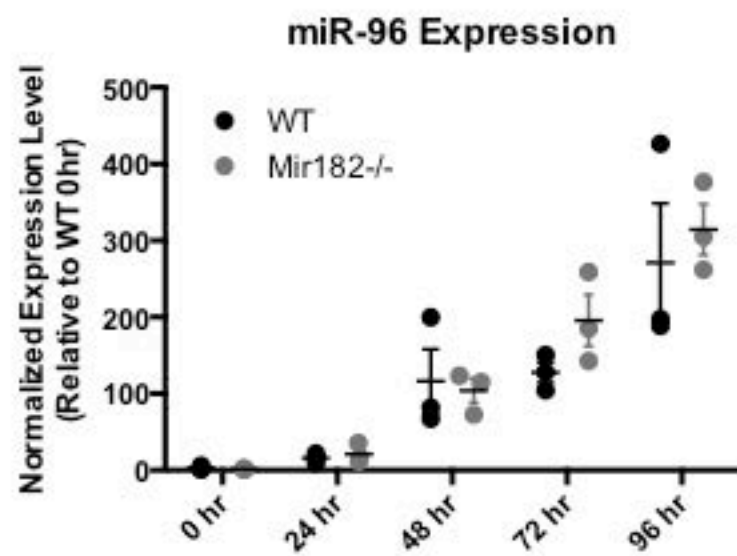

Figure S4. Expression of miR-182 family members miR-183 and miR-96.
